# Supplementary material for: Marburgvirus Resurgence in Kitaka Mine Bat Population after Extermination Attempts, Uganda
Source: PubMed Central journal article supplement (PMC4193183; doi:10.3201/eid2010.140696), 2014-10
Supplement: 14-0696-Techapp-s1.pdf [file 14-0696-Techapp-s1.pdf]

# Marburgviruses in Bats in Mine after Extermination Attempts, Uganda

## Technical Appendix

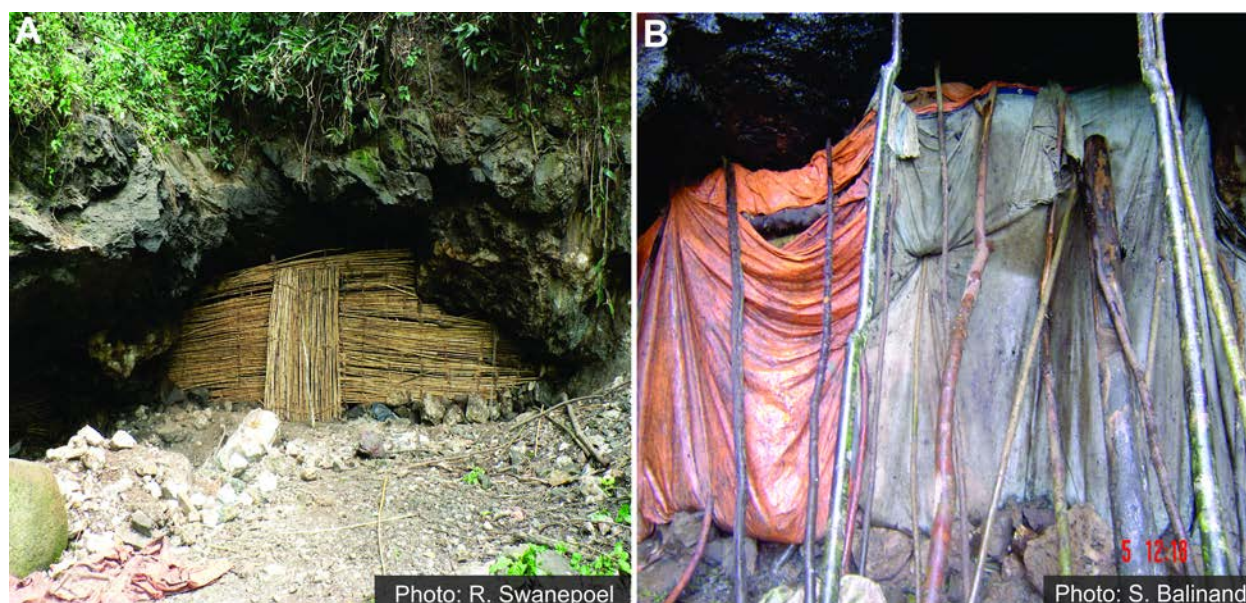

Technical Appendix Figure. Photographs taken at Kitaka Mine, Uganda, between August 2008 and September 2009 showing local efforts to exterminate and exclude *Rousettus aegyptiacus* bats from the mine. A) Papyrus reed walls constructed over entrances and air shafts in the mine. B) Plastic tarps used to completely seal off all access to the mine. Photographs courtesy of R. Swanepoel and S. Balinandi.

Technical Appendix Table. Demographic characteristics of bats captured during a Marburg hemorrhagic fever outbreak investigation at Kitaka Mine, Uganda, November 2012\*

| Characteristic | Total no. | No. (%) marburgvirus-positive bats |           |
|----------------|-----------|------------------------------------|-----------|
|                |           | Reverse transcription PCR          | IgG       |
| Sex            |           |                                    |           |
| Female         | 203       | 25 (12.3)                          | 30 (14.8) |
| Male           | 197       | 28 (14.2)                          | 36 (18.3) |
| Age group      |           |                                    |           |
| Adult          | 233       | 32 (13.7)                          | 46 (19.7) |
| Juvenile       | 167       | 21 (12.6)                          | 20 (12.0) |

\*All animal work was performed in accordance with protocols approved by the Animal Care and Use Committee, Centers for Disease Control and Prevention.
